# Supplementary material for: Assessment of Burnt Polyethylene Impact on Physicochemical and Biological Properties of Soil at Esereso-adagya Landfill, Ghana
Source: Research Square preprint supplement (doi:10.21203/rs.3.rs-7464330/v1), 2025-09-30
Supplement: Supplementary file 1 [file f5f3c61e6dd50d70679d9b0b.docx]

**HIGHLIGHTS OF THE STUDY**

- Polyethylene's characterization results were consistent with a typical polyethylene polymer. As a result, high levels of heavy metals such as lead (0.06%), cadmium (0.23%), and arsenic (0.47%) were found in polyethylene waste samples, raising environmental concerns about their toxicity and potential health effects, particularly given their historical use as stabilizers in plastic manufacturing.
- Although landfill soil contains the most phosphate and potassium, which increases nutritional availability, it is worth noting that its nitrogen content is minimal. Conversely, control soil holds more nitrogen, which must exist for healthy soils.
- Landfill soil contains the highest quantities of cadmium, arsenic, lead, and mercury, creating severe environmental and health concerns about potential bioaccumulation and soil contamination.
- Landfill soil had much higher amounts of microbial carbon, nitrogen, and phosphorus, indicating increased microbial biomass and the potential for better biodegradation, but it also raises worries about nutrient leaching as well as environmental contamination.
